# Supplementary material for: The mechanism of static postural control in the impact of lower limb muscle strength asymmetry on gait performance in the elderly
Source: PeerJ. 2024 Jun 27;12:e17626. doi: 10.7717/peerj.17626 (PMC11214735; doi:10.7717/peerj.17626)
Supplement: Supplemental Information 1 [file peerj-12-17626-s001.xlsx]

## Sheet: Sheet1
No.	group	age	gender	height	mass	BMI	preferred limb side	strong limb side	left knee extension peak toque	right knee extension peak toque	strong knee extension peak toque	weak knee extension peak toque	asymmetry	CSEO-SVI	CSEC-SVI	NSEO-SVI	NSEC-SVI	CSEO-AOE	CSEC-AOE	NSEO-AOE	NSEC-AOE	gait velocity	cadence	strong-step length	weak-step length	strong-stride length	weak-stride length	strong-step time	weak-step time	strong-stride time	weak-stride time	strong-stance time	weak-stance time	strong-swing time	weak-swing time	strong-single support time	weak-single support time	strong-double support time	weak-double support time	strong-stance time	weakstance time	strong-swing time	weak-swing time	strong-single support time	weak-single support time	strong-double support time	weak-double support time
	SG=0	year	female=1	cm	kg	kg/m²	left=1	left=1	Nm	Nm	Nm	Nm	%					mm²	mm²	mm²	mm²	cm/s	steps/min	cm	cm	cm	cm	s	s	s	s	s	s	s	s	s	s	s	s	%	%	%	%	%	%	%	%
1	0	69	2	164	62.1	23.1	2	2	68.519	68.966	68.519	68.966	0.00648145	7.24	9.03	9.58	7.22	51.1	66.32	79.75	93.27	74.97	87.66	55.096	53.45	108.15	110.25	0.704	0.663	1.475	1.46	0.819	0.802	0.52	0.524	0.564	0.548	0.254	0.254	61.1	60.5	38.9	39.5	38.3	37.5	17.2	17.4
2	0	63	2	171	58.8	20.1	2	1	104.767	103.54	104.767	103.54	0.0117117	7.591	9.093	10.093	11.307	58.33	111.35	118.27	91.78	86.38	94.57	70.175	56.642	114.8	117.915	0.644	0.62	1.374	1.379	0.771	0.776	0.474	0.449	0.511	0.472	0.261	0.304	61.9	63.4	38.1	36.6	37.2	34.2	19	22.1
3	0	66	1	163	57.1	21.5	1	2	19.657	19.93	19.93	19.657	0.0136979	5.87	6.33	5.48	6.31	42.32	65.76	53.83	68.68	91.2	115.13	51.35	48.075	99.1	101.383	0.533	0.503	1.115	0.99	0.627	0.609	0.399	0.39	0.441	0.396	0.186	0.213	61.1	61	38.9	39	39.5	40	16.7	21.5
4	0	72	1	163	70.7	26.6	2	2	52.845	53.63	53.63	52.845	0.0146373	7.56	7.86	10.16	8.04	376.63	332.4	212.19	198.3	89.2	109.34	58.888	51.596	92.517	110.163	0.576	0.52	0.938	1.28	0.673	0.688	0.28	0.478	0.408	0.423	0.264	0.264	70.6	59	29.4	41	43.5	33.1	28.2	20.7
5	0	74	1	150	58.8	26.1	2	1	54.153	52.792	54.153	52.792	0.0251325	8.35	8.5	8.85	10.31	54.63	73.15	59.87	161.14	78.7	92.79	49.175	57.896	108.442	106.546	0.504	0.546	0.971	1.125	0.604	0.641	0.378	0.377	0.408	0.446	0.196	0.196	61.5	63	38.5	37	42	39.6	20.2	17.4
6	0	64	2	172	60.8	20.6	2	1	98.856	95.726	98.856	95.726	0.0316622	9.14	8.52	7.96	9.78	27.38	75.72	45.13	145.88	84.62	78.55	64.619	85.12	156.494	124.32	0.794	0.664	1.918	1.225	0.91	0.792	0.781	0.45	0.641	0.568	0.269	0.224	53.8	63.8	46.2	36.2	33.4	46.3	14	18.3
7	0	70	1	150	64.7	28.8	2	2	68.709	72.09	72.09	68.709	0.0468997	7.7	8.03	8.63	7.96	103.9	79.85	71.4	94.13	107.01	113.21	60.258	59.745	119.21	120.925	0.518	0.541	1.032	1.143	0.646	0.631	0.391	0.386	0.428	0.413	0.218	0.218	62.3	62.1	37.7	37.9	41.5	36.1	21.2	19.1
8	0	63	2	172	75.8	25.6	2	1	99.389	94.481	99.389	94.481	0.0493817	10.64	9.5	11.26	9.09	178.91	84.5	159.08	129.02	119.61	113.26	67.41	68.04	134.794	135.135	0.506	0.547	1.006	1.165	0.62	0.649	0.389	0.386	0.383	0.452	0.237	0.198	61.4	62.7	38.6	37.3	38.1	38.8	23.6	17
9	0	68	2	177	71.3	22.8	1	1	120.609	112.349	120.609	112.349	0.0684858	8.79	8.21	8.45	8.25	63.46	43.9	81.45	105.76	91.94	95.71	60.235	61.571	122.29	122.5	0.629	0.621	1.355	1.359	0.734	0.759	0.475	0.449	0.491	0.516	0.243	0.243	60.7	62.8	39.3	37.2	36.3	38	17.9	17.8
10	0	69	1	171	75.1	25.7	2	2	49.616	53.726	53.726	49.616	0.0764993	6.67	6.51	10.6	9.16	60.45	49.48	162.27	142.61	91.89	107.66	54.979	52.875	107.858	109.288	0.584	0.526	1.084	1.205	0.689	0.646	0.393	0.452	0.464	0.421	0.225	0.225	63.7	58.8	36.3	41.2	42.8	35	20.7	18.6
11	0	69	2	183	94.6	28.2	2	2	124.138	135.161	124.138	135.161	0.0815546	9.08	9.83	9.63	9.55	79.89	116.31	170.87	141.26	100.96	96.17	65.66	67.655	133	134.881	0.65	0.59	1.37	1.179	0.764	0.734	0.453	0.449	0.53	0.453	0.235	0.282	62.8	62.1	37.2	37.9	38.7	38.4	17.1	23.9
12	0	68	1	162	55.4	21.1	1	1	30.061	27.546	30.061	27.546	0.0836632	6.82	7.21	7.36	8.78	61.1	62.45	94.37	52.96	71.41	65.38	72.538	68.67	142.844	139.738	0.504	0.529	1.143	1.151	0.567	0.603	0.436	0.398	0.429	0.466	0.138	0.138	56.5	60.3	43.5	39.7	37.5	40.5	12	12
13	0	60	2	173	71.6	23.9	2	1	115.583	105.721	115.583	105.721	0.085324	7.76	9.62	6.34	7.38	76.96	59.35	53.94	67.43	64.24	72.51	57.896	53.988	112.77	111.563	0.508	0.539	1.006	1.137	0.625	0.635	0.393	0.397	0.396	0.438	0.229	0.196	61.4	61.5	38.6	38.5	39.3	38.5	22.8	17.3
14	0	68	1	167	69.9	25.1	2	1	55.016	50.276	55.016	50.276	0.0861568	3.33	5.42	5.01	6.32	33.47	45.36	66.37	46.47	92.85	94.58	61.215	63	123.62	124.985	0.643	0.623	1.386	1.404	0.747	0.761	0.49	0.491	0.505	0.519	0.242	0.242	60.4	60.8	39.6	39.2	36.5	37	17.4	17.2
15	0	72	1	158	74	29.6	2	1	81.433	74.409	81.433	74.409	0.086255	6.08	5.86	6.54	7.33	70.9	37.93	86.75	87.41	98.53	104.16	59.967	60.13	118.86	120.26	0.579	0.568	1.099	1.248	0.704	0.679	0.405	0.434	0.468	0.443	0.236	0.236	63.5	61	36.5	39	42.6	35.5	21.5	18.9
16	0	63	1	163	64.3	24.2	2	1	71.4	64.061	71.4	64.061	0.102787	10.97	9.54	10.37	8.38	84.41	56.74	66.25	54.13	113.05	120.15	58.829	60.165	118.545	119.07	0.489	0.509	0.958	1.089	0.597	0.6	0.369	0.369	0.397	0.401	0.2	0.2	61.8	61.9	38.2	38.1	41.4	36.8	20.8	18.3
17	0	73	1	152	51.5	22.3	2	2	34.536	39.083	39.083	34.536	0.116342	7.02	7.18	9.23	7.88	41.05	43.51	71.54	42.66	62.47	60.93	66.01	64.155	131.381	129.85	0.495	0.556	1.164	1.164	0.601	0.645	0.414	0.39	0.387	0.467	0.214	0.178	59.2	62.3	40.8	37.7	33.3	40.1	18.4	15.3
18	0	69	1	159	50.7	20.1	2	2	39.382	44.711	44.711	39.382	0.119188	9.59	11.57	8.67	7.55	134.24	283.73	104.1	127.9	91.2	115.13	51.35	48.075	99.1	101.383	0.533	0.503	1.115	0.99	0.627	0.609	0.399	0.39	0.441	0.396	0.186	0.213	61.1	61	38.9	39	39.5	40	16.7	21.5
19	0	68	1	155	44.6	18.6	2	2	25.364	28.818	28.818	25.364	0.119856	7.18	7.21	6.9	6.65	68.29	55.71	62.85	82.85	84.49	98.22	56.992	60.2	108.296	111.154	0.606	0.614	1.313	1.3	0.728	0.744	0.464	0.432	0.476	0.491	0.253	0.253	61.1	63.3	38.9	36.7	36.2	37.8	19.2	19.4
20	0	71	2	169	62.6	21.9	2	1	62.181	54.498	62.181	54.498	0.123559	9.5	7.02	5.4	7.28	390.92	51.6	90.42	98.09	84.76	138.31	47.55	43.247	79.778	70.525	0.448	0.388	0.927	0.808	0.546	0.477	0.313	0.278	0.348	0.299	0.198	0.178	63.6	63.2	36.4	36.8	37.6	37	21.4	22.1
21	0	71	2	162	51.3	19.5	1	2	56.021	64.523	64.523	56.021	0.131767	7.8	9.47	7.32	8.14	54.2	194.82	54.33	177.52	103.36	123.85	61.542	61.425	103.017	102.988	0.47	0.496	0.908	1.026	0.59	0.588	0.336	0.34	0.378	0.376	0.212	0.212	63.7	63.4	36.3	36.6	41.6	36.7	23.4	20.7
22	0	65	1	168	75.6	26.8	2	1	49.991	43.363	49.991	43.363	0.132584	8.91	10.09	8.72	9.04	68.91	79.85	100.49	104.83	78.76	100.36	49.825	48.4	98.379	97.9	0.567	0.623	1.249	1.279	0.7	0.747	0.434	0.426	0.425	0.506	0.275	0.241	61.7	63.7	38.3	36.3	34	39.6	22	18.8
23	0	75	2	164	68.6	25.5	2	1	79.827	69.223	79.827	69.223	0.132837	8.49	5.63	9.44	6.41	245.8	70.03	253.03	125.76	107.37	102.37	84.569	65.52	132.86	134.619	0.593	0.572	1.142	1.116	0.698	0.697	0.446	0.443	0.489	0.446	0.209	0.251	61	61.7	39	38.3	42.8	39.9	18.3	22.5
24	0	69	1	154	51.2	21.6	2	1	70.526	60.994	70.526	60.994	0.135156	6.38	7.48	9.38	8.86	87.98	123.77	107.16	136.05	109.92	114.79	59.208	62.16	122.08	121.31	0.513	0.53	1.001	1.145	0.636	0.632	0.373	0.388	0.412	0.408	0.224	0.224	63	62	37	38	41.2	35.6	22.4	19.6
25	0	66	1	163	62.4	23.5	2	1	89.094	76.91	89.094	76.91	0.136754	5	7.25	5.88	9.52	39.75	75.66	72.93	121.26	116.06	104.85	69.913	72.38	143.15	140.394	0.579	0.561	1.259	1.102	0.664	0.685	0.431	0.419	0.455	0.477	0.209	0.209	60.6	62.1	39.4	37.9	36.1	43.2	16.6	18.9
26	0	66	1	163	69.2	26	2	2	50.739	59.021	59.021	50.739	0.140323	5.19	5.52	4.9	9.12	78.48	75.64	125.42	187.36	107.09	105.26	67.305	62.545	128.844	129.535	0.542	0.592	1.063	1.253	0.656	0.679	0.418	0.439	0.437	0.497	0.219	0.183	61.1	60.8	38.9	39.2	41.1	39.6	20.6	14.6
27	0	61	2	173	67.6	22.6	2	1	128.572	110.073	128.572	110.073	0.14388	6.17	5.74	10.27	9.48	41.63	29.49	42.67	62.64	112.99	110.14	64.435	65.975	130.095	131.6	0.567	0.516	1.197	1.029	0.657	0.63	0.409	0.405	0.471	0.407	0.186	0.223	61.6	60.9	38.4	39.1	39.4	39.6	15.5	21.7
28	0	69	2	169	53.4	18.7	2	2	67.287	79.094	79.094	67.287	0.149278	11.2	6.94	7.81	6.35	342.83	56.18	83.85	45.04	62.47	60.93	66.01	64.155	131.381	129.85	0.495	0.556	1.164	1.164	0.601	0.645	0.414	0.39	0.387	0.467	0.214	0.178	59.2	62.3	40.8	37.7	33.3	40.1	18.4	15.3
29	0	70	2	170	76.8	26.6	2	1	102.927	87.536	102.927	87.536	0.149533	9.18	6.32	8.89	8.82	342.88	81.01	451.3	166.64	105.49	116.9	67.76	56.963	113.108	114.03	0.527	0.494	1.111	0.968	0.617	0.608	0.392	0.372	0.429	0.389	0.188	0.219	61.2	62.1	38.8	37.9	38.6	40.2	16.9	22.7
30	1	68	2	181	74.6	22.8	2	1	117.154	97.874	117.154	97.874	0.16457	9.04	9.34	8.9	9.49	90.21	139.37	79.93	60.07	76.81	90.74	51.875	54.308	105.846	106.283	0.645	0.675	1.275	1.395	0.815	0.82	0.47	0.438	0.5	0.505	0.315	0.315	63.5	65.2	36.5	34.8	39.3	36.2	24.7	22.6
31	1	62	1	155	54.3	22.6	2	1	69.497	57.774	69.497	57.774	0.168684	10.462	12.141	10.444	11.85	54.19	113.86	91.56	151.99	86.24	99.46	54.775	54.075	108.529	110.355	0.57	0.543	1.208	1.07	0.697	0.698	0.395	0.386	0.437	0.395	0.26	0.304	63.8	64.4	36.2	35.6	36.2	36.9	21.6	28.4
32	1	68	1	165	60.8	22.3	2	1	44.856	35.943	44.856	35.943	0.198703	14.39	10.89	16.82	11.54	404.7	203.32	211.56	449.78	68.62	91.07	49.6	44.15	93.425	93.392	0.621	0.6	1.314	1.175	0.783	0.802	0.42	0.38	0.443	0.415	0.339	0.388	65.1	67.8	34.9	32.2	33.8	35.3	25.8	33
33	1	61	1	169	73.6	25.8	2	2	73.022	92.117	92.117	73.022	0.207291	4.33	5.77	8.75	8.27	52.83	107.51	183.38	153.8	79.51	90.15	56.088	54.775	111.335	110.542	0.557	0.656	1.12	1.156	0.707	0.781	0.42	0.415	0.412	0.528	0.295	0.253	62.7	65.3	37.3	34.7	36.8	45.7	26.3	21.9
34	1	69	2	169	68	23.8	2	1	74.146	58.338	74.146	58.338	0.213201	7.34	10.65	9.01	11.83	106.53	254.91	95.78	305.15	82.04	92.17	56.408	55.883	111.971	115.255	0.66	0.636	1.41	1.281	0.794	0.808	0.483	0.471	0.513	0.48	0.282	0.329	62.2	63.2	37.8	36.8	36.4	37.5	20	25.7
35	1	67	1	162	57.8	22	1	2	35.251	45.065	45.065	35.251	0.217774	6.94	8.6	10.43	11.36	90.91	151.79	227.92	199.44	83.93	92.28	56.963	57.68	115.115	114.345	0.592	0.606	1.316	1.321	0.73	0.731	0.443	0.445	0.466	0.467	0.264	0.264	62.2	62.2	37.8	37.8	35.4	35.4	20.1	20
36	1	67	1	160	50	19.5	2	1	79.296	61.226	79.296	61.226	0.22788	9.56	5.28	8.19	10.71	345.82	113.72	119.99	161.73	78.76	100.36	49.825	48.4	98.379	97.9	0.567	0.623	1.249	1.279	0.7	0.747	0.434	0.426	0.425	0.506	0.275	0.241	61.7	63.7	38.3	36.3	34	39.6	22	18.8
37	1	60	1	150	57.9	25.7	2	1	89.649	68.179	89.649	68.179	0.23949	7.14	10.34	7.5	10.45	58.54	72.25	47.99	138.98	116.06	104.85	69.913	72.38	143.15	140.394	0.579	0.561	1.259	1.102	0.664	0.685	0.431	0.419	0.455	0.477	0.209	0.209	60.6	62.1	39.4	37.9	36.1	43.2	16.6	18.9
38	1	74	1	164	69.1	25.7	2	1	71.217	53.696	71.217	53.696	0.246023	9.83	11.62	12.64	15.34	177.29	170.54	244.67	405.82	46.89	78.73	35.333	38.092	73.967	72.956	0.757	0.765	1.47	1.607	0.981	1.013	0.493	0.482	0.509	0.541	0.472	0.472	66.6	67.8	33.4	32.2	36.4	33.6	32.1	29.4
39	1	65	2	160	59.8	23.4	2	1	89.357	67.273	89.357	67.273	0.247143	13.61	8.07	12.94	9	290.65	111.83	357.29	103.62	75.43	94.71	56.992	50.925	99.45	102.171	0.643	0.614	1.351	1.339	0.773	0.755	0.468	0.458	0.519	0.466	0.253	0.29	62.3	62.3	37.7	37.7	38.4	34.8	18.8	21.6
40	1	65	2	176	81.6	26.3	2	1	97.147	73.132	97.147	73.132	0.247203	9.52	10.33	10.66	11.7	115.93	265.26	104.78	243.6	42.5	60.37	44.25	43.313	87.25	87.9	0.651	0.624	1.236	1.249	0.803	0.824	0.443	0.423	0.452	0.472	0.352	0.352	64.5	66.1	35.5	33.9	36.5	37.8	28.4	28.2
41	1	65	1	163	66.3	25	2	1	72.36	52.405	72.36	52.405	0.275774	7.28	10.71	8.91	13.2	59.94	208.06	180.53	529.95	69.57	81.69	52.75	54.396	112.292	107.304	0.533	0.933	1.67	1.08	0.916	1.047	0.64	0.386	0.419	0.55	0.497	0.497	58.9	73.1	41.1	26.9	25.1	50.9	29.8	46
42	1	66	2	169	67.3	23.6	2	2	71.885	99.687	99.687	71.885	0.278893	10.67	13.77	10.66	11.38	61.35	203.67	58.45	218.47	72.58	83.4	55.077	54.542	111.02	109.288	0.641	0.677	1.272	1.431	0.824	0.819	0.454	0.476	0.476	0.52	0.348	0.299	64.5	63.2	35.5	36.8	37.4	36.4	27.4	20.9
43	1	66	1	175	54.8	17.9	2	1	56.115	38.844	56.115	38.844	0.307779	15.19	12.86	15.51	13.81	342.53	347.25	456.54	283.39	99.08	125.13	57.546	57.896	97.533	98.675	0.466	0.486	0.883	1.022	0.576	0.589	0.328	0.349	0.349	0.39	0.228	0.199	63.7	62.8	36.3	37.2	39.5	38.2	25.8	19.5
44	1	65	2	174	74.4	24.6	2	1	90.417	62.175	90.417	62.175	0.312353	6.99	9.16	11.54	15.27	115.92	324.78	219.3	486.99	52.7	62.44	60.579	53.988	105.467	107.45	0.655	0.728	1.508	1.492	0.881	0.937	0.481	0.399	0.446	0.503	0.435	0.435	64.7	70.2	35.3	29.8	29.6	33.7	28.8	29.1
45	1	75	2	178	75.3	23.8	2	2	105.629	155.895	155.895	105.629	0.322435	7.8	6.27	9.26	9.85	137.41	99.28	146.11	276.33	92.86	94.71	63.035	61.133	123.41	125.09	0.653	0.612	1.381	1.374	0.784	0.75	0.441	0.474	0.515	0.482	0.269	0.269	64	61.3	36	38.7	37.3	35.1	19.5	19.6
46	1	69	1	163	61.7	23.2	2	1	51.943	35.073	51.943	35.073	0.324779	9.26	9.43	8.34	10.85	109.65	53.36	103.62	88.96	63.44	74.25	52.75	54.483	107.917	106.313	0.658	0.713	1.231	1.659	0.829	0.887	0.457	0.625	0.484	0.541	0.345	0.345	64.5	58.7	35.5	41.3	39.3	32.6	28.1	20.8
47	1	66	1	158	76.8	30.8	2	1	68.379	45.874	68.379	45.874	0.329122	7.6	10.23	10.95	14.66	113.96	80.11	82.35	389.28	72.89	83.67	54.425	55.067	109.095	109.171	0.622	0.724	1.437	1.285	0.809	0.885	0.467	0.435	0.435	0.564	0.374	0.321	63.4	67.1	36.6	32.9	30.2	43.9	26	25
48	1	68	2	170	73.9	25.6	2	1	88.223	56.987	88.223	56.987	0.354057	9.97	10.68	16.54	11.35	98.34	236.83	411.98	602.87	70.62	72.82	55.971	68.845	133.56	124.46	1.075	0.572	1.337	1.086	1.24	1.206	0.489	0.405	0.441	0.407	0.399	0.399	71.7	74.9	28.3	25.1	33	37.5	27.8	23.6
49	1	67	2	173	66.7	22.3	2	2	40.615	62.934	62.934	40.615	0.354641	12.05	6.95	10.49	10.84	346.8	96.25	356.45	337.98	63.26	84.86	46.813	45.9	93.025	93.2	0.706	0.705	1.363	1.496	0.907	0.837	0.469	0.54	0.574	0.504	0.333	0.333	65.9	60.8	34.1	39.2	42.1	33.7	24.4	22.2
50	1	60	1	166	69.1	25.1	2	1	79.622	50.942	79.622	50.942	0.360202	6.34	7.23	8.97	9.82	83.47	98.2	253.68	300.85	84.49	98.22	60.2	56.992	111.154	108.296	0.614	0.606	1.3	1.313	0.744	0.728	0.432	0.464	0.491	0.476	0.253	0.253	63.3	61.1	36.7	38.9	37.8	36.2	19.4	19.2
51	1	71	2	165	55.9	20.5	2	1	84.655	52.816	84.655	52.816	0.376103	11.693	13.878	13.191	15.898	98.06	136.47	159.93	156.64	91.94	95.71	60.235	61.571	122.29	122.5	0.629	0.621	1.355	1.359	0.734	0.759	0.475	0.449	0.491	0.516	0.243	0.243	60.7	62.8	39.3	37.2	36.3	38	17.9	17.8
52	1	60	1	168	82.6	29.3	1	2	35.751	61.803	61.803	35.751	0.421533	7.72	6.4	8.29	10.08	95.4	126.46	95.05	235.38	85.94	96.03	57.692	55.271	112.735	112.642	0.542	0.559	1.028	1.194	0.668	0.666	0.378	0.418	0.418	0.451	0.25	0.214	63.8	61.4	36.2	38.6	40.6	37.8	24.3	17.9
53	1	62	1	152	48.2	20.9	2	1	56.927	32.266	56.927	32.266	0.433204	9.68	9.72	10.42	12.75	102.9	69.17	74.4	110.24	82.41	98.13	53.667	51.85	103.95	106.692	0.604	0.617	1.185	1.202	0.726	0.764	0.458	0.437	0.458	0.495	0.269	0.269	61.3	63.6	38.7	36.4	38.6	41.2	22.7	22.4
54	1	63	1	151	56.9	25	2	1	77.289	42.174	77.289	42.174	0.454334	4.85	6.63	9.63	8.37	17.07	16.72	56.13	59.17	88.51	103.29	55.242	53.3	107.975	110.95	0.591	0.566	1.132	1.137	0.698	0.686	0.437	0.45	0.472	0.46	0.226	0.226	61.5	60.4	38.5	39.6	41.7	40.5	19.9	19.9
55	1	67	1	156	51.5	21.2	2	2	28.889	53.505	53.505	28.889	0.460069	12.93	17.82	13.19	15.6	125.28	435.64	196.97	512.64	74.97	87.66	55.096	53.45	108.15	110.25	0.704	0.663	1.475	1.46	0.819	0.802	0.52	0.524	0.564	0.548	0.254	0.254	61.1	60.5	38.9	39.5	38.3	37.5	17.2	17.4
